# Supplementary material
Source: publisher site journal article supplement (https://www.spandidos-publications.com/455/downloadSupplementary)

Figure S1. Purity of isolated oligodendrocyte precursor cells identified using flow cytometry. (A) PDGFRA and (B) NG2 counts. PDGFRA, platelet derived growth factor receptor  $\alpha$ ; NG2, neural/glial antigen.

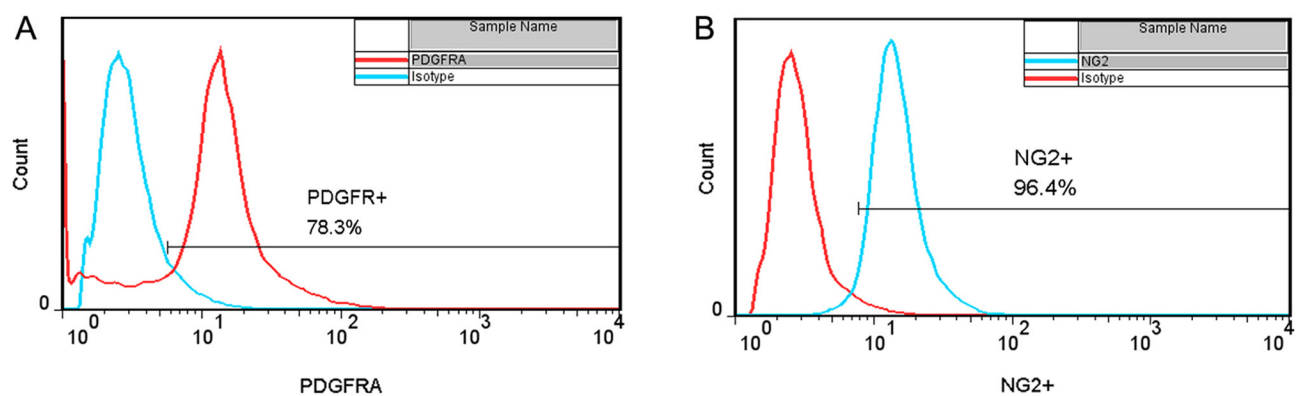

Supplement: Supplementary file 1 [file downloadSupplementary]
